# Supplementary material for: Increasing likelihood of heat-related mortality events with global warming: a continental epidemiological extreme event attribution study
Source: Research Square preprint supplement (doi:10.21203/rs.3.rs-5549732/v1), 2024-12-27
Supplement: Supplementary file 1 [file 3564eaddb89537fb78c59679.pdf]

# Increasing likelihood of heat-related mortality events with global warming: a continental epidemiological extreme event attribution study

Authors: Thessa M Beck<sup>1,2</sup>, Lukas Gudmundsson<sup>3</sup>, Dominik L Schumacher<sup>3</sup>, Sonia I Seneviratne<sup>3</sup>, Hicham Achebak<sup>1,4</sup>, Joan Ballester<sup>1</sup>

<sup>1</sup> ISGlobal, Barcelona, Spain

<sup>2</sup> Universitat Pompeu Fabra (UPF), Barcelona, Spain

<sup>3</sup> Institute for Atmospheric and Climate Science, ETH Zürich, Zürich, Switzerland

<sup>4</sup> Institut National de la Santé et de la Recherche Médicale, France Cohortes, Paris, France

## Supplementary Material

**Table S1:** Medians of return periods of the hottest week and deadliest week in 2022 at 1.2 °C and pre-industrial, and the resulting probability ratios for Catalonia, Spain. Values in brackets are the 95% confidence obtained by bootstrapping and Monte Carlo simulations.

|             | Return Period<br>1.2°C (2022) | Return Period<br>pre-industrial | Probability Ratio       |
|-------------|-------------------------------|---------------------------------|-------------------------|
| Temperature | 7.4<br>(3.8 – 25.4)           | 33,832<br>(333.1 – Inf)         | 4,219.7<br>(30.7 – Inf) |
| Mortality   | 15.2<br>(6.9 – 46.5)          | 434.8<br>(61.0 – 53,578)        | 28.5<br>(3.8 – 2,647.3) |

**Table S2:** Population-weighted medians of return periods of the hottest week and deadliest week in 2022 at 1.2 °C and pre-industrial, and the resulting probability ratios. Values in brackets are the 95% confidence obtained by bootstrapping and Monte Carlo simulations. Southern Europe comprises Albania, Cyprus, Greece, Spain, Croatia, Italy, Montenegro, Malta, Portugal, Serbia and Slovenia.

|                               | Return Period<br>1.2°C (2022)     | Return Period<br>pre-industrial       | Probability Ratio                   |
|-------------------------------|-----------------------------------|---------------------------------------|-------------------------------------|
| <b>Temperature</b>            | <b>4.5</b><br><b>(2.5 – 18.8)</b> | <b>56.8</b><br><b>(9.2 – 1,791.1)</b> | <b>12.7</b><br><b>(3.6 - 157.3)</b> |
| Temperature – Southern Europe | 7.5<br>(3.8 – 102.6)              | 1,292.4<br>(26.5 – Inf)               | 92.1<br>(7.3 – Inf)                 |
| <b>Mortality</b>              | <b>8.0</b><br><b>(3.6 – 20.8)</b> | <b>21.6</b><br><b>(9.7 – 140)</b>     | <b>3.0</b><br><b>(1.02 – 18.6)</b>  |
| Mortality - Southern Europe   | 10.7<br>(5.2 – 34.2)              | 371.8<br>(62.48 – 49,216.2)           | 27.5<br>(3.8-2,354.3)               |
| Mortality - Italy             | 6.0<br>(3.1- 27.5)                | 1,292.5<br>(131.8 – Inf)              | 59.9<br>(7.0 – 70,307.6)            |

|                      |                     |                          |                       |
|----------------------|---------------------|--------------------------|-----------------------|
| Mortality - Lombardy | 9.4<br>(4.7 – 33.2) | 6,356.7<br>(349.1 – Inf) | 677.4<br>(33.0 – Inf) |
| Mortality - Calabria | 8.3<br>(3.7 – 23.1) | 21.8<br>(21.8 – Inf)     | 3.8<br>(2.4 – Inf)    |

**Table S3:** Population-weighted medians of return periods of the deadliest week in 2022 for different population groups, and the resulting probability ratios. The last column reports the heat-related mortality rate in deaths per million for the deadliest week of the 2022 summer. Values in brackets are the 95% confidence intervals obtained by bootstrapping and Monte Carlo simulations.

|              | Return Period<br>1.2 °C (2022) | Return Period<br>pre-industrial | Probability<br>Ratio | Heat-related<br>mortality 2022 |
|--------------|--------------------------------|---------------------------------|----------------------|--------------------------------|
| Women        | 6.0<br>(2.8 – 13.9)            | 22.4<br>(9.3 -136.9)            | 5.0<br>(1.3 – 22.2)  | 23 .3<br>(9.1 – 34.2)          |
| Men          | 6.6<br>(3.2 – 13.8)            | 18.1<br>(9.1 – 99.8)            | 3.5<br>(1.3 – 18.4)  | 19.1<br>(10.9 – 26.8)          |
|              |                                |                                 |                      |                                |
| Ages < 65    | 7.2<br>(2.5 – 23.6)            | 59.7<br>(10.5 – 3,049.8)        | 7.5<br>(1.4 – 227.6) | 3.5<br>(0.2 – 6.1)             |
| Ages 65 - 79 | 7.3<br>(3.2 – 20.3)            | 54.9<br>(11.9 – 741.2)          | 7.5<br>(1.1- 69.3)   | 39.7<br>(11.9 – 65.3)          |
| Ages > 80    | 8.8<br>(4.2 – 19.0)            | 29.6<br>(10.9 – 242.6)          | 4 .0<br>(1.1 – 24.5) | 293.1<br>(101.2 – 483.9)       |

**Table S4:** Population-weighted medians of return periods for the deadliest week in 2022 at pre-industrial, 1.2 °C, 1.5 °C, and 2°C, and the resulting probability ratios. Values in brackets are the 95% confidence obtained by bootstrapping and Monte Carlo simulations.

|                              | 0 °C                       | 1.2 °C                  | 1.5 °C                   | 2.0 °C                     |
|------------------------------|----------------------------|-------------------------|--------------------------|----------------------------|
| Return Period                | 21.6<br>(9.7 – 140.0)      | 8.0<br>(3.6 – 20.8)     | 4.9<br>(2.0 – 12.7)      | 2.5<br>(1.1 – 9.5)         |
| Probability Ratio            |                            | 3.0<br>(1.02 – 18.7)    | 4.8<br>(1.16 – 38.7)     | 8.1<br>(1.24 – 77.2)       |
| Return Period<br>– Spain     | 422.5<br>(71.2 – 49,544.5) | 13.2<br>(6.1 – 40.6)    | 6.2<br>(2.4 – 21.6)      | 2.1<br>(1.1 – 7.7)         |
| Probability Ratio<br>- Spain |                            | 29.0<br>(3.3 – 2,354.2) | 59.1<br>(5.4 – 10,272.3) | 141.6<br>(12.2 – 15,487.7) |



**a) Probability Ratio (Temperature)**

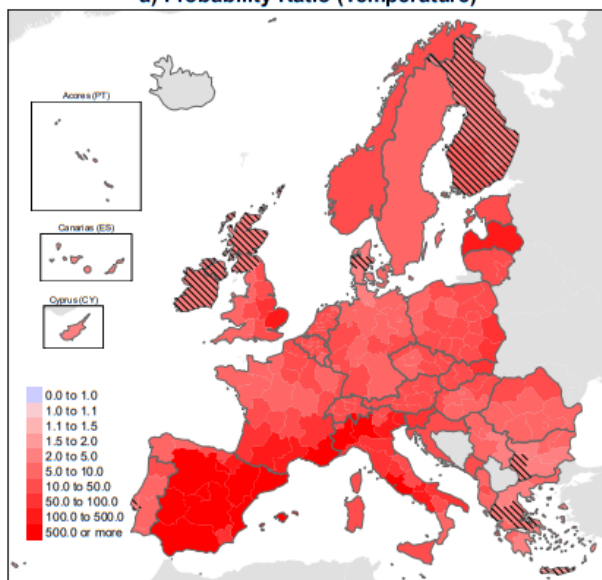

**b) Probability Ratio (Mortality)**

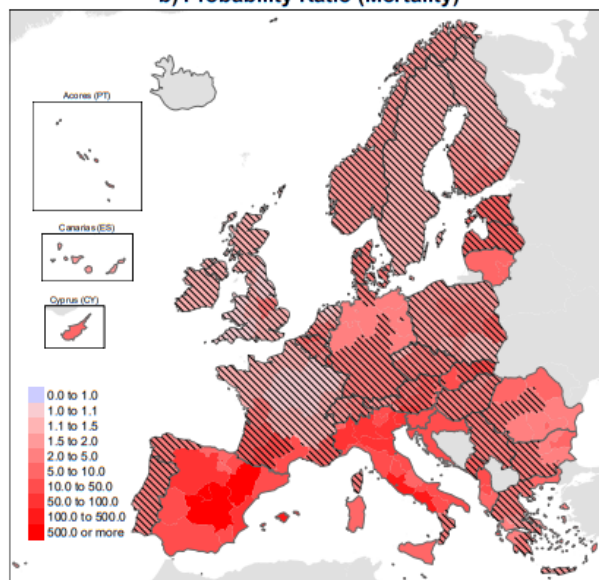

**c) Probability Ratio (Temperature)**

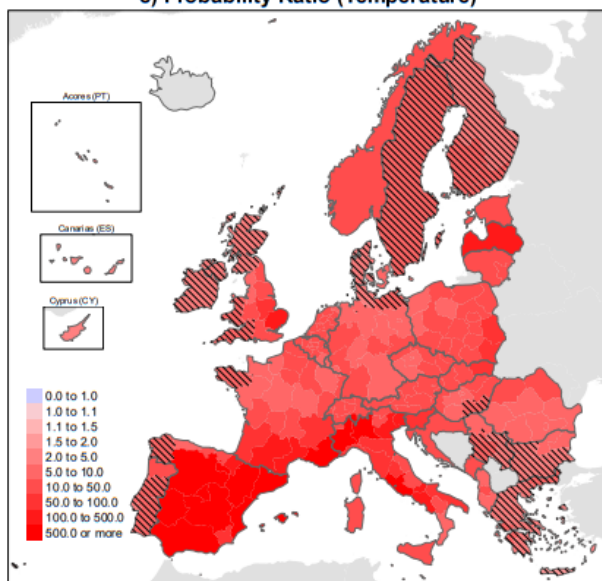

**d) Probability Ratio (Mortality)**

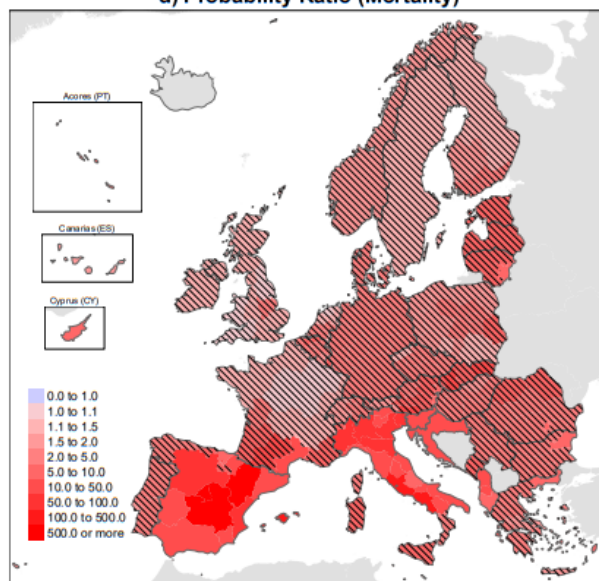

**e) Probability Ratio (Temperature)**

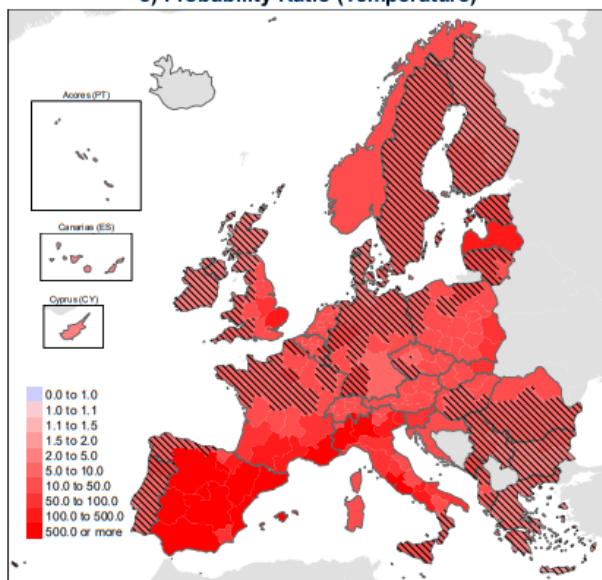

**f) Probability Ratio (Mortality)**

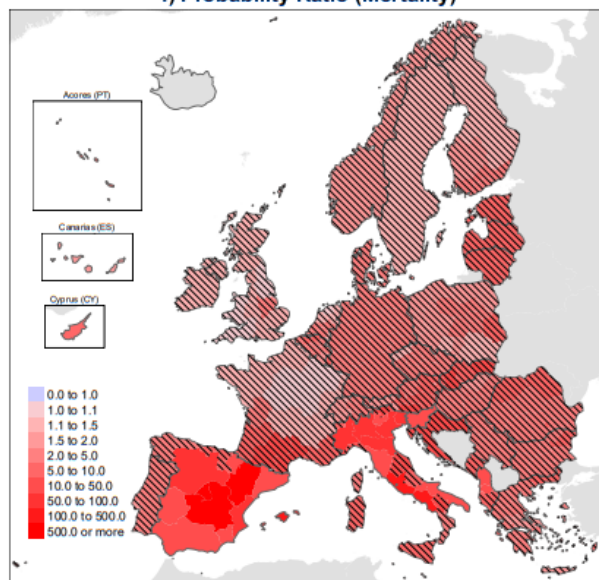

**Figure S1** depicts the median regional probability ratios between 1.2°C and pre-industrial climatic conditions. Hatched areas illustrate regions where the probability ratio is not significantly greater than two (Panels a + b), three (Panels c + d), and five (Panels e + f) at the 0.1 significance level.
